# Supplementary material for: Risk Propagation of Delayed Payment in Stakeholder Network of Large Hydropower Project Construction considering Risk Resistance and Mitigation
Source: Hindawi journal article supplement (doi:10.1155/2018/8013207), 2018-07-05
Supplement: f1 [file 8013207.f1.zip]

Archive with 7 entries (7 files):
- Degree_Distribution.m
- Distribution_analysis.m
- matrix.xls
- Proba_analysis.m
- RPDP_without_mitigation.m
- RPDP_with_mitigation.m
- SNCPYHS_random_network.m
