# Supplementary material for: Risk Propagation of Delayed Payment in Stakeholder Network of Large Hydropower Project Construction considering Risk Resistance and Mitigation
Source: Hindawi journal article supplement (doi:10.1155/2018/8013207), 2018-07-05
Supplement: f1 [file 8013207.f1.zip › Degree_Distribution.m]

function [DeD,aver_DeD]=Degree_Distribution(A)
%A¡ª¡ª¡ª¡ª¡ª¡ª¡ª¡ªadjacency matrix
%DeD¡ª¡ª¡ª¡ª¡ª¡ª¡ª¡ªnodes' degree
%aver_DeD¡ª¡ª¡ª¡ª¡ª¡ª¡ªaverage degree
N=size(A,2);
DeD=zeros(1,N);
for i=1:N
   DeD(i)=sum(A(i,:));
end
aver_DeD=mean(DeD);
