# Supplementary material for: Risk Propagation of Delayed Payment in Stakeholder Network of Large Hydropower Project Construction considering Risk Resistance and Mitigation
Source: Hindawi journal article supplement (doi:10.1155/2018/8013207), 2018-07-05
Supplement: f1 [file 8013207.f1.zip › Distribution_analysis.m]

clear all;clc
A=xlsread('matrix.xls','sheet3');
[DeD,aver_DeD]=Degree_Distribution(A);
DeD;
[y,x]=hist(DeD,50);        
y=y/length(DeD)/mean(diff(x));  
bar(x,y,1);
%%
clear all;clc
A=xlsread('matrix.xls','simulation data');
[DeD,aver_DeD]=Degree_Distribution(A);
DeD;
[y,x]=hist(DeD,50);        
y=y/length(DeD)/mean(diff(x));  
bar(x,y,1);
