# Supplementary material for: Risk Propagation of Delayed Payment in Stakeholder Network of Large Hydropower Project Construction considering Risk Resistance and Mitigation
Source: Hindawi journal article supplement (doi:10.1155/2018/8013207), 2018-07-05
Supplement: f1 [file 8013207.f1.zip › matrix.xls]

## Sheet: data of contract prices
	Owner	PC	PD	PCC	PS	QI1	QI2	S1	S2	S3	S4	S5	S6	D1	D2	D3	D4	D5	CC1	CC2	CC3	CC4	CC5	CC6	CC7	CC8	CC9	CC10	CC11	CC12	CC13	CC14	CC15	CC16	CC17	CC18	CC19	CC20	CC21	CC22	CC23	CC24	CC25	CC26	CC27	Sup1	Sup2	Sup3	Sup4
Owner	0	401330	101441	299889	28370.9	100.1	2456.42	0	0	0	0	0	0	0	0	0	0	0	0	0	0	0	0	0	0	0	0	0	0	0	0	0	0	0	0	0	0	0	0	0	0	0	0	0	0	0	101.816	92.94	100
PC	401330	0	0	0	0	0	0	0	0	0	0	0	0	0	0	0	0	0	0	0	0	0	0	0	0	0	0	0	0	0	0	0	0	0	0	0	0	0	0	0	0	0	0	0	0	37720	0	0	0
PD	101441	0	0	0	0	0	0	0	0	0	0	0	0	4929.23	1022.56	74869.7	8578.62	7556.05	0	0	0	0	0	0	0	0	0	0	0	0	0	0	0	0	0	0	0	0	0	0	0	0	0	0	0	0	0	0	0
PCC	299889	0	0	0	0	0	0	0	0	0	0	0	0	0	0	0	0	0	2730	193.164	289.746	22229.6	3242.35	3812.85	1400	4800	20387	7200	2592.91	15069.3	37300.5	3779.1	1000	7058.52	1200	500	7200	5587	3840	10185.6	10241.1	301.57	150	6400	26682.4	0	0	0	0
PS	28370.9	0	0	0	0	0	0	763.511	8886.19	42708.1	2224.12	998.4	3330	0	0	0	0	0	0	0	0	0	0	0	0	0	0	0	0	0	0	0	0	0	0	0	0	0	0	0	0	0	0	0	0	0	0	0	0
QI1	100.1	0	0	0	0	0	0	0	0	0	0	0	0	0	0	0	0	0	0	0	0	0	0	0	0	0	0	0	0	0	0	0	0	0	0	0	0	0	0	0	0	0	0	0	0	0	0	0	0
QI2	2456.42	0	0	0	0	0	0	0	0	0	0	0	0	0	0	0	0	0	0	0	0	0	0	0	0	0	0	0	0	0	0	0	0	0	0	0	0	0	0	0	0	0	0	0	0	0	0	0	0
S1	0	0	0	0	763.511	0	0	0	0	0	0	0	0	0	0	0	0	0	0	0	0	0	0	0	0	0	0	0	0	0	0	0	0	0	0	0	0	0	0	0	0	0	0	0	0	0	0	0	0
S2	0	0	0	0	8886.19	0	0	0	0	0	0	0	0	0	0	0	0	0	0	0	0	0	0	0	0	0	0	0	0	0	0	0	0	0	0	0	0	0	0	0	0	0	0	0	0	0	0	0	0
S3	0	0	0	0	42708.1	0	0	0	0	0	0	0	0	0	0	0	0	0	0	0	0	0	0	0	0	0	0	0	0	0	0	0	0	0	0	0	0	0	0	0	0	0	0	0	0	0	0	0	0
S4	0	0	0	0	2224.12	0	0	0	0	0	0	0	0	0	0	0	0	0	0	0	0	0	0	0	0	0	0	0	0	0	0	0	0	0	0	0	0	0	0	0	0	0	0	0	0	0	0	0	0
S5	0	0	0	0	998.4	0	0	0	0	0	0	0	0	0	0	0	0	0	0	0	0	0	0	0	0	0	0	0	0	0	0	0	0	0	0	0	0	0	0	0	0	0	0	0	0	0	0	0	0
S6	0	0	0	0	3330	0	0	0	0	0	0	0	0	0	0	0	0	0	0	0	0	0	0	0	0	0	0	0	0	0	0	0	0	0	0	0	0	0	0	0	0	0	0	0	0	0	0	0	0
D1	0	0	4929.23	0	0	0	0	0	0	0	0	0	0	0	0	0	0	0	0	0	0	0	0	0	0	0	0	0	0	0	0	0	0	0	0	0	0	0	0	0	0	0	0	0	0	0	0	0	0
D2	0	0	1022.56	0	0	0	0	0	0	0	0	0	0	0	0	0	0	0	0	0	0	0	0	0	0	0	0	0	0	0	0	0	0	0	0	0	0	0	0	0	0	0	0	0	0	0	0	0	0
D3	0	0	74869.7	0	0	0	0	0	0	0	0	0	0	0	0	0	0	0	0	0	0	0	0	0	0	0	0	0	0	0	0	0	0	0	0	0	0	0	0	0	0	0	0	0	0	0	0	0	0
D4	0	0	8578.62	0	0	0	0	0	0	0	0	0	0	0	0	0	0	0	0	0	0	0	0	0	0	0	0	0	0	0	0	0	0	0	0	0	0	0	0	0	0	0	0	0	0	0	0	0	0
D5	0	0	7556.05	0	0	0	0	0	0	0	0	0	0	0	0	0	0	0	0	0	0	0	0	0	0	0	0	0	0	0	0	0	0	0	0	0	0	0	0	0	0	0	0	0	0	0	0	0	0
CC1	0	0	0	2730	0	0	0	0	0	0	0	0	0	0	0	0	0	0	0	0	0	0	0	0	0	0	0	0	0	0	0	0	0	0	0	0	0	0	0	0	0	0	0	0	0	3.35626	0	0	0
CC2	0	0	0	193.164	0	0	0	0	0	0	0	0	0	0	0	0	0	0	0	0	0	0	0	0	0	0	0	0	0	0	0	0	0	0	0	0	0	0	0	0	0	0	0	0	0	0.237476	0	0	0
CC3	0	0	0	289.746	0	0	0	0	0	0	0	0	0	0	0	0	0	0	0	0	0	0	0	0	0	0	0	0	0	0	0	0	0	0	0	0	0	0	0	0	0	0	0	0	0	0.356213	0	0	0
CC4	0	0	0	22229.6	0	0	0	0	0	0	0	0	0	0	0	0	0	0	0	0	0	0	0	0	0	0	0	0	0	0	0	0	0	0	0	0	0	0	0	0	0	0	0	0	0	27.329	0	0	0
CC5	0	0	0	3242.35	0	0	0	0	0	0	0	0	0	0	0	0	0	0	0	0	0	0	0	0	0	0	0	0	0	0	0	0	0	0	0	0	0	0	0	0	0	0	0	0	0	3.98614	0	0	0
CC6	0	0	0	3812.85	0	0	0	0	0	0	0	0	0	0	0	0	0	0	0	0	0	0	0	0	0	0	0	0	0	0	0	0	0	0	0	0	0	0	0	0	0	0	0	0	0	4.68751	0	0	0
CC7	0	0	0	1400	0	0	0	0	0	0	0	0	0	0	0	0	0	0	0	0	0	0	0	0	0	0	0	0	0	0	0	0	0	0	0	0	0	0	0	0	0	0	0	0	0	1.72116	0	0	0
CC8	0	0	0	4800	0	0	0	0	0	0	0	0	0	0	0	0	0	0	0	0	0	0	0	0	0	0	0	0	0	0	0	0	0	0	0	0	0	0	0	0	0	0	0	0	0	5.90112	0	0	0
CC9	0	0	0	20387	0	0	0	0	0	0	0	0	0	0	0	0	0	0	0	0	0	0	0	0	0	0	0	0	0	0	0	0	0	0	0	0	0	0	0	0	0	0	0	0	0	25.0638	0	0	0
CC10	0	0	0	7200	0	0	0	0	0	0	0	0	0	0	0	0	0	0	0	0	0	0	0	0	0	0	0	0	0	0	0	0	0	0	0	0	0	0	0	0	0	0	0	0	0	8.85167	0	0	0
CC11	0	0	0	2592.91	0	0	0	0	0	0	0	0	0	0	0	0	0	0	0	0	0	0	0	0	0	0	0	0	0	0	0	0	0	0	0	0	0	0	0	0	0	0	0	0	0	3.18772	0	0	0
CC12	0	0	0	15069.3	0	0	0	0	0	0	0	0	0	0	0	0	0	0	0	0	0	0	0	0	0	0	0	0	0	0	0	0	0	0	0	0	0	0	0	0	0	0	0	0	0	18.5262	0	0	0
CC13	0	0	0	37300.5	0	0	0	0	0	0	0	0	0	0	0	0	0	0	0	0	0	0	0	0	0	0	0	0	0	0	0	0	0	0	0	0	0	0	0	0	0	0	0	0	0	45.8573	0	0	0
CC14	0	0	0	3779.1	0	0	0	0	0	0	0	0	0	0	0	0	0	0	0	0	0	0	0	0	0	0	0	0	0	0	0	0	0	0	0	0	0	0	0	0	0	0	0	0	0	4.64602	0	0	0
CC15	0	0	0	1000	0	0	0	0	0	0	0	0	0	0	0	0	0	0	0	0	0	0	0	0	0	0	0	0	0	0	0	0	0	0	0	0	0	0	0	0	0	0	0	0	0	1.2294	0	0	0
CC16	0	0	0	7058.52	0	0	0	0	0	0	0	0	0	0	0	0	0	0	0	0	0	0	0	0	0	0	0	0	0	0	0	0	0	0	0	0	0	0	0	0	0	0	0	0	0	8.67774	0	0	0
CC17	0	0	0	1200	0	0	0	0	0	0	0	0	0	0	0	0	0	0	0	0	0	0	0	0	0	0	0	0	0	0	0	0	0	0	0	0	0	0	0	0	0	0	0	0	0	1.47528	0	0	0
CC18	0	0	0	500	0	0	0	0	0	0	0	0	0	0	0	0	0	0	0	0	0	0	0	0	0	0	0	0	0	0	0	0	0	0	0	0	0	0	0	0	0	0	0	0	0	0.6147	0	0	0
CC19	0	0	0	7200	0	0	0	0	0	0	0	0	0	0	0	0	0	0	0	0	0	0	0	0	0	0	0	0	0	0	0	0	0	0	0	0	0	0	0	0	0	0	0	0	0	8.85167	0	0	0
CC20	0	0	0	5587	0	0	0	0	0	0	0	0	0	0	0	0	0	0	0	0	0	0	0	0	0	0	0	0	0	0	0	0	0	0	0	0	0	0	0	0	0	0	0	0	0	6.86865	0	0	0
CC21	0	0	0	3840	0	0	0	0	0	0	0	0	0	0	0	0	0	0	0	0	0	0	0	0	0	0	0	0	0	0	0	0	0	0	0	0	0	0	0	0	0	0	0	0	0	4.72089	0	0	0
CC22	0	0	0	10185.6	0	0	0	0	0	0	0	0	0	0	0	0	0	0	0	0	0	0	0	0	0	0	0	0	0	0	0	0	0	0	0	0	0	0	0	0	0	0	0	0	0	12.5222	0	0	0
CC23	0	0	0	10241.1	0	0	0	0	0	0	0	0	0	0	0	0	0	0	0	0	0	0	0	0	0	0	0	0	0	0	0	0	0	0	0	0	0	0	0	0	0	0	0	0	0	12.5904	0	0	0
CC24	0	0	0	301.57	0	0	0	0	0	0	0	0	0	0	0	0	0	0	0	0	0	0	0	0	0	0	0	0	0	0	0	0	0	0	0	0	0	0	0	0	0	0	0	0	0	0.37075	0	0	0
CC25	0	0	0	150	0	0	0	0	0	0	0	0	0	0	0	0	0	0	0	0	0	0	0	0	0	0	0	0	0	0	0	0	0	0	0	0	0	0	0	0	0	0	0	0	0	0.18441	0	0	0
CC26	0	0	0	6400	0	0	0	0	0	0	0	0	0	0	0	0	0	0	0	0	0	0	0	0	0	0	0	0	0	0	0	0	0	0	0	0	0	0	0	0	0	0	0	0	0	0	0	0	0
CC27	0	0	0	26682.4	0	0	0	0	0	0	0	0	0	0	0	0	0	0	0	0	0	0	0	0	0	0	0	0	0	0	0	0	0	0	0	0	0	0	0	0	0	0	0	0	0	0	0	0	0
Sup1	0	37720	0	0	0	0	0	0	0	0	0	0	0	0	0	0	0	0	3.35626	0.237476	0.356213	27.329	3.98614	4.68751	1.72116	5.90112	25.0638	8.85167	3.18772	18.5262	45.8573	4.64602	1.2294	8.67774	1.47528	0.6147	8.85167	6.86865	4.72089	12.5222	12.5904	0.37075	0.18441	0	0	0	0	0	0
Sup2	101.816	0	0	0	0	0	0	0	0	0	0	0	0	0	0	0	0	0	0	0	0	0	0	0	0	0	0	0	0	0	0	0	0	0	0	0	0	0	0	0	0	0	0	0	0	0	0	0	0
Sup3	92.94	0	0	0	0	0	0	0	0	0	0	0	0	0	0	0	0	0	0	0	0	0	0	0	0	0	0	0	0	0	0	0	0	0	0	0	0	0	0	0	0	0	0	0	0	0	0	0	0
Sup4	100	0	0	0	0	0	0	0	0	0	0	0	0	0	0	0	0	0	0	0	0	0	0	0	0	0	0	0	0	0	0	0	0	0	0	0	0	0	0	0	0	0	0	0	0	0	0	0	0
Sup5	16296.9	44411.3	0	0	0	0	0	0	0	0	0	0	0	0	0	0	0	0	0	0	0	0	0	0	0	0	0	0	0	0	0	0	0	0	0	0	0	0	0	0	0	0	0	0	0	0	0	0	0
Sup6	1003.92	0	0	0	0	0	0	0	0	0	0	0	0	0	0	0	0	0	0	0	0	0	0	0	0	0	0	0	0	0	0	0	0	0	0	0	0	0	0	0	0	0	0	0	0	0	0	0	0
Sup7	0	66245.6	0	0	0	0	0	0	0	0	0	0	0	0	0	0	0	0	117.035	8.28091	12.4214	952.98	138.999	163.456	60.0178	205.775	873.988	308.663	111.158	0	0	162.01	42.8699	302.598	51.4438	21.4349	308.663	239.514	164.62	436.657	439.034	12.9283	6.43048	0	0	0	0	0	0
Sup8	0	55556	0	0	0	0	0	0	0	0	0	0	0	0	0	0	0	0	106.936	7.56635	11.3495	10.56	127.005	149.352	54.8388	188.019	798.571	282.028	101.566	0	0	148.03	39.1706	276.486	47.0047	19.5853	282.028	218.846	150.415	398.978	401.15	11.8127	5.87559	0	0	0	0	0	0
Sup9	0	2500	0	0	0	0	0	0	0	0	0	0	0	0	0	0	0	0	0	0	0	0	0	0	0	0	0	0	0	0	0	0	0	0	0	0	0	0	0	0	0	0	0	0	0	0	0	0	0
Sup10	0	3861	0	0	0	0	0	0	0	0	0	0	0	0	0	0	0	0	0	0	0	0	0	0	0	0	0	0	0	0	0	0	0	0	0	0	0	0	0	0	0	0	0	0	0	0	0	0	0
Sup11	0	3800	0	0	0	0	0	0	0	0	0	0	0	0	0	0	0	0	0	0	0	0	0	0	0	0	0	0	0	0	0	0	0	0	0	0	0	0	0	0	0	0	0	0	0	0	0	0	0
Sup12	0	48.6	0	0	0	0	0	0	0	0	0	0	0	0	0	0	0	0	0	0	0	0	0	0	0	0	0	0	0	0	0	0	0	0	0	0	0	0	0	0	0	0	0	0	0	0	0	0	0
Sup13	0	759.32	0	0	0	0	0	0	0	0	0	0	0	0	0	0	0	0	0	0	0	0	0	0	0	0	0	0	0	0	0	0	0	0	0	0	0	0	0	0	0	0	0	0	0	0	0	0	0
Sup14	0	38	0	0	0	0	0	0	0	0	0	0	0	0	0	0	0	0	0	0	0	0	0	0	0	0	0	0	0	0	38	0	0	0	0	0	0	0	0	0	0	0	0	0	0	0	0	0	0
Sup15	0	0	0	0	0	0	0	0	0	0	0	0	0	0	0	0	0	0	0	0	0	0	0	0	0	0	0	0	0	0	6886.4	0	0	0	0	0	0	0	0	0	0	0	0	0	0	0	0	0	0
Sup16	0	0	0	0	0	0	0	0	0	0	0	0	0	0	0	0	0	0	0	0	0	0	0	0	0	0	0	0	0	0	5562.6	0	0	0	0	0	0	0	0	0	0	0	0	0	0	0	0	0	0
Sup17	0	0	0	0	0	0	0	0	0	0	0	0	0	0	0	0	0	0	0	0	0	0	0	0	0	0	0	0	0	424	0	0	0	0	0	0	0	0	0	0	0	0	0	0	0	0	0	0	0
Sup18	0	0	0	0	0	0	0	0	0	0	0	0	0	0	0	0	0	0	5.863	0	0	0	0	0	0	0	0	0	0	0	0	0	0	0	0	0	0	0	0	0	0	0	0	0	0	0	0	0	0
Sup19	0	0	0	0	0	0	0	0	0	0	0	0	0	0	0	0	0	0	0	0	90.694	0	0	0	0	0	0	0	0	0	0	0	0	0	0	0	0	0	0	0	0	0	0	0	0	0	0	0	0
[truncated: 15 more columns]

## Sheet: Sheet3
The interpretations of the nodes in the data of contract price		Owner	PC	PD	PCC	PS	QI1	QI2	S1	S2	S3	S4	S5	S6	D1	D2	D3	D4	D5	CC1	CC2	CC3	CC4	CC5	CC6	CC7	CC8	CC9	CC10	CC11	CC12	CC13	CC14	CC15	CC16	CC17	CC18	CC19	CC20	CC21	CC22	CC23	CC24	CC25	CC26	CC27	Sup1	Sup2	Sup3
Hydropower Project Investor (Yalong River Hydropower Development Company, Ltd)	Owner	0	401330	101441	299889	28370.9	100.1	2456.42	0	0	0	0	0	0	0	0	0	0	0	0	0	0	0	0	0	0	0	0	0	0	0	0	0	0	0	0	0	0	0	0	0	0	0	0	0	0	0	101.816	92.94
Prime Contractor formed by Designer and Prime Construction Contractor (Huadong Engineering Corporation Limited and Sinohydro Bureau 7 Co.,Ltd)	PC	401330	0	0	0	0	0	0	0	0	0	0	0	0	0	0	0	0	0	0	0	0	0	0	0	0	0	0	0	0	0	0	0	0	0	0	0	0	0	0	0	0	0	0	0	0	37720	0	0
Prime Designer(Huadong Engineering Corporation Limited)	PD	101441	0	0	0	0	0	0	0	0	0	0	0	0	4929.23	1022.56	74869.7	8578.62	7556.05	0	0	0	0	0	0	0	0	0	0	0	0	0	0	0	0	0	0	0	0	0	0	0	0	0	0	0	0	0	0
Prime Construction Contractor(Sinohydro Bureau 7 Co.,Ltd)	PCC	299889	0	0	0	0	0	0	0	0	0	0	0	0	0	0	0	0	0	2730	193.164	289.746	22229.6	3242.35	3812.85	1400	4800	20387	7200	2592.91	15069.3	37300.5	3779.1	1000	7058.52	1200	500	7200	5587	3840	10185.6	10241.1	301.57	150	6400	26682.4	0	0	0
Prime Supervisor(Changjiang institute of survey, planning, design and research)	PS	28370.9	0	0	0	0	0	0	763.511	8886.19	42708.1	2224.12	998.4	3330	0	0	0	0	0	0	0	0	0	0	0	0	0	0	0	0	0	0	0	0	0	0	0	0	0	0	0	0	0	0	0	0	0	0	0
Department 1 of Quality Inspection	QI1	100.1	0	0	0	0	0	0	0	0	0	0	0	0	0	0	0	0	0	0	0	0	0	0	0	0	0	0	0	0	0	0	0	0	0	0	0	0	0	0	0	0	0	0	0	0	0	0	0
Department 2 of Quality Inspection	QI2	2456.42	0	0	0	0	0	0	0	0	0	0	0	0	0	0	0	0	0	0	0	0	0	0	0	0	0	0	0	0	0	0	0	0	0	0	0	0	0	0	0	0	0	0	0	0	0	0	0
Sub-supervisor 1	S1	0	0	0	0	763.511	0	0	0	0	0	0	0	0	0	0	0	0	0	0	0	0	0	0	0	0	0	0	0	0	0	0	0	0	0	0	0	0	0	0	0	0	0	0	0	0	0	0	0
Sub-supervisor 2	S2	0	0	0	0	8886.19	0	0	0	0	0	0	0	0	0	0	0	0	0	0	0	0	0	0	0	0	0	0	0	0	0	0	0	0	0	0	0	0	0	0	0	0	0	0	0	0	0	0	0
Sub-supervisor 3	S3	0	0	0	0	42708.1	0	0	0	0	0	0	0	0	0	0	0	0	0	0	0	0	0	0	0	0	0	0	0	0	0	0	0	0	0	0	0	0	0	0	0	0	0	0	0	0	0	0	0
Sub-supervisor 4	S4	0	0	0	0	2224.12	0	0	0	0	0	0	0	0	0	0	0	0	0	0	0	0	0	0	0	0	0	0	0	0	0	0	0	0	0	0	0	0	0	0	0	0	0	0	0	0	0	0	0
Sub-supervisor 5	S5	0	0	0	0	998.4	0	0	0	0	0	0	0	0	0	0	0	0	0	0	0	0	0	0	0	0	0	0	0	0	0	0	0	0	0	0	0	0	0	0	0	0	0	0	0	0	0	0	0
Sub-supervisor 6	S6	0	0	0	0	3330	0	0	0	0	0	0	0	0	0	0	0	0	0	0	0	0	0	0	0	0	0	0	0	0	0	0	0	0	0	0	0	0	0	0	0	0	0	0	0	0	0	0	0
Designer 1	D1	0	0	4929.23	0	0	0	0	0	0	0	0	0	0	0	0	0	0	0	0	0	0	0	0	0	0	0	0	0	0	0	0	0	0	0	0	0	0	0	0	0	0	0	0	0	0	0	0	0
Designer 2	D2	0	0	1022.56	0	0	0	0	0	0	0	0	0	0	0	0	0	0	0	0	0	0	0	0	0	0	0	0	0	0	0	0	0	0	0	0	0	0	0	0	0	0	0	0	0	0	0	0	0
Designer 3	D3	0	0	74869.7	0	0	0	0	0	0	0	0	0	0	0	0	0	0	0	0	0	0	0	0	0	0	0	0	0	0	0	0	0	0	0	0	0	0	0	0	0	0	0	0	0	0	0	0	0
Designer 4	D4	0	0	8578.62	0	0	0	0	0	0	0	0	0	0	0	0	0	0	0	0	0	0	0	0	0	0	0	0	0	0	0	0	0	0	0	0	0	0	0	0	0	0	0	0	0	0	0	0	0
Designer 5	D5	0	0	7556.05	0	0	0	0	0	0	0	0	0	0	0	0	0	0	0	0	0	0	0	0	0	0	0	0	0	0	0	0	0	0	0	0	0	0	0	0	0	0	0	0	0	0	0	0	0
Construction Contractor 1	CC1	0	0	0	2730	0	0	0	0	0	0	0	0	0	0	0	0	0	0	0	0	0	0	0	0	0	0	0	0	0	0	0	0	0	0	0	0	0	0	0	0	0	0	0	0	0	3.35626	0	0
Construction Contractor 2	CC2	0	0	0	193.164	0	0	0	0	0	0	0	0	0	0	0	0	0	0	0	0	0	0	0	0	0	0	0	0	0	0	0	0	0	0	0	0	0	0	0	0	0	0	0	0	0	0.237476	0	0
Construction Contractor 3	CC3	0	0	0	289.746	0	0	0	0	0	0	0	0	0	0	0	0	0	0	0	0	0	0	0	0	0	0	0	0	0	0	0	0	0	0	0	0	0	0	0	0	0	0	0	0	0	0.356213	0	0
Construction Contractor 4	CC4	0	0	0	22229.6	0	0	0	0	0	0	0	0	0	0	0	0	0	0	0	0	0	0	0	0	0	0	0	0	0	0	0	0	0	0	0	0	0	0	0	0	0	0	0	0	0	27.329	0	0
Construction Contractor 5	CC5	0	0	0	3242.35	0	0	0	0	0	0	0	0	0	0	0	0	0	0	0	0	0	0	0	0	0	0	0	0	0	0	0	0	0	0	0	0	0	0	0	0	0	0	0	0	0	3.98614	0	0
Construction Contractor 6	CC6	0	0	0	3812.85	0	0	0	0	0	0	0	0	0	0	0	0	0	0	0	0	0	0	0	0	0	0	0	0	0	0	0	0	0	0	0	0	0	0	0	0	0	0	0	0	0	4.68751	0	0
Construction Contractor 7	CC7	0	0	0	1400	0	0	0	0	0	0	0	0	0	0	0	0	0	0	0	0	0	0	0	0	0	0	0	0	0	0	0	0	0	0	0	0	0	0	0	0	0	0	0	0	0	1.72116	0	0
Construction Contractor 8	CC8	0	0	0	4800	0	0	0	0	0	0	0	0	0	0	0	0	0	0	0	0	0	0	0	0	0	0	0	0	0	0	0	0	0	0	0	0	0	0	0	0	0	0	0	0	0	5.90112	0	0
Construction Contractor 9	CC9	0	0	0	20387	0	0	0	0	0	0	0	0	0	0	0	0	0	0	0	0	0	0	0	0	0	0	0	0	0	0	0	0	0	0	0	0	0	0	0	0	0	0	0	0	0	25.0638	0	0
Construction Contractor 10	CC10	0	0	0	7200	0	0	0	0	0	0	0	0	0	0	0	0	0	0	0	0	0	0	0	0	0	0	0	0	0	0	0	0	0	0	0	0	0	0	0	0	0	0	0	0	0	8.85167	0	0
Construction Contractor 11	CC11	0	0	0	2592.91	0	0	0	0	0	0	0	0	0	0	0	0	0	0	0	0	0	0	0	0	0	0	0	0	0	0	0	0	0	0	0	0	0	0	0	0	0	0	0	0	0	3.18772	0	0
Construction Contractor 12	CC12	0	0	0	15069.3	0	0	0	0	0	0	0	0	0	0	0	0	0	0	0	0	0	0	0	0	0	0	0	0	0	0	0	0	0	0	0	0	0	0	0	0	0	0	0	0	0	18.5262	0	0
Construction Contractor 13	CC13	0	0	0	37300.5	0	0	0	0	0	0	0	0	0	0	0	0	0	0	0	0	0	0	0	0	0	0	0	0	0	0	0	0	0	0	0	0	0	0	0	0	0	0	0	0	0	45.8573	0	0
Construction Contractor 14	CC14	0	0	0	3779.1	0	0	0	0	0	0	0	0	0	0	0	0	0	0	0	0	0	0	0	0	0	0	0	0	0	0	0	0	0	0	0	0	0	0	0	0	0	0	0	0	0	4.64602	0	0
Construction Contractor 15	CC15	0	0	0	1000	0	0	0	0	0	0	0	0	0	0	0	0	0	0	0	0	0	0	0	0	0	0	0	0	0	0	0	0	0	0	0	0	0	0	0	0	0	0	0	0	0	1.2294	0	0
Construction Contractor 16	CC16	0	0	0	7058.52	0	0	0	0	0	0	0	0	0	0	0	0	0	0	0	0	0	0	0	0	0	0	0	0	0	0	0	0	0	0	0	0	0	0	0	0	0	0	0	0	0	8.67774	0	0
Construction Contractor 17	CC17	0	0	0	1200	0	0	0	0	0	0	0	0	0	0	0	0	0	0	0	0	0	0	0	0	0	0	0	0	0	0	0	0	0	0	0	0	0	0	0	0	0	0	0	0	0	1.47528	0	0
Construction Contractor 18	CC18	0	0	0	500	0	0	0	0	0	0	0	0	0	0	0	0	0	0	0	0	0	0	0	0	0	0	0	0	0	0	0	0	0	0	0	0	0	0	0	0	0	0	0	0	0	0.6147	0	0
Construction Contractor 19	CC19	0	0	0	7200	0	0	0	0	0	0	0	0	0	0	0	0	0	0	0	0	0	0	0	0	0	0	0	0	0	0	0	0	0	0	0	0	0	0	0	0	0	0	0	0	0	8.85167	0	0
Construction Contractor 20	CC20	0	0	0	5587	0	0	0	0	0	0	0	0	0	0	0	0	0	0	0	0	0	0	0	0	0	0	0	0	0	0	0	0	0	0	0	0	0	0	0	0	0	0	0	0	0	6.86865	0	0
Construction Contractor 21	CC21	0	0	0	3840	0	0	0	0	0	0	0	0	0	0	0	0	0	0	0	0	0	0	0	0	0	0	0	0	0	0	0	0	0	0	0	0	0	0	0	0	0	0	0	0	0	4.72089	0	0
Construction Contractor 22	CC22	0	0	0	10185.6	0	0	0	0	0	0	0	0	0	0	0	0	0	0	0	0	0	0	0	0	0	0	0	0	0	0	0	0	0	0	0	0	0	0	0	0	0	0	0	0	0	12.5222	0	0
Construction Contractor 23	CC23	0	0	0	10241.1	0	0	0	0	0	0	0	0	0	0	0	0	0	0	0	0	0	0	0	0	0	0	0	0	0	0	0	0	0	0	0	0	0	0	0	0	0	0	0	0	0	12.5904	0	0
Construction Contractor 24	CC24	0	0	0	301.57	0	0	0	0	0	0	0	0	0	0	0	0	0	0	0	0	0	0	0	0	0	0	0	0	0	0	0	0	0	0	0	0	0	0	0	0	0	0	0	0	0	0.37075	0	0
Construction Contractor 25	CC25	0	0	0	150	0	0	0	0	0	0	0	0	0	0	0	0	0	0	0	0	0	0	0	0	0	0	0	0	0	0	0	0	0	0	0	0	0	0	0	0	0	0	0	0	0	0.18441	0	0
Construction Contractor 26	CC26	0	0	0	6400	0	0	0	0	0	0	0	0	0	0	0	0	0	0	0	0	0	0	0	0	0	0	0	0	0	0	0	0	0	0	0	0	0	0	0	0	0	0	0	0	0	0	0	0
Construction Contractor 27	CC27	0	0	0	26682.4	0	0	0	0	0	0	0	0	0	0	0	0	0	0	0	0	0	0	0	0	0	0	0	0	0	0	0	0	0	0	0	0	0	0	0	0	0	0	0	0	0	0	0	0
Supplier 1	Sup1	0	37720	0	0	0	0	0	0	0	0	0	0	0	0	0	0	0	0	3.35626	0.237476	0.356213	27.329	3.98614	4.68751	1.72116	5.90112	25.0638	8.85167	3.18772	18.5262	45.8573	4.64602	1.2294	8.67774	1.47528	0.6147	8.85167	6.86865	4.72089	12.5222	12.5904	0.37075	0.18441	0	0	0	0	0
Supplier 2	Sup2	101.816	0	0	0	0	0	0	0	0	0	0	0	0	0	0	0	0	0	0	0	0	0	0	0	0	0	0	0	0	0	0	0	0	0	0	0	0	0	0	0	0	0	0	0	0	0	0	0
Supplier 3	Sup3	92.94	0	0	0	0	0	0	0	0	0	0	0	0	0	0	0	0	0	0	0	0	0	0	0	0	0	0	0	0	0	0	0	0	0	0	0	0	0	0	0	0	0	0	0	0	0	0	0
Supplier 4	Sup4	100	0	0	0	0	0	0	0	0	0	0	0	0	0	0	0	0	0	0	0	0	0	0	0	0	0	0	0	0	0	0	0	0	0	0	0	0	0	0	0	0	0	0	0	0	0	0	0
Supplier 5	Sup5	16296.9	44411.3	0	0	0	0	0	0	0	0	0	0	0	0	0	0	0	0	0	0	0	0	0	0	0	0	0	0	0	0	0	0	0	0	0	0	0	0	0	0	0	0	0	0	0	0	0	0
Supplier 6	Sup6	1003.92	0	0	0	0	0	0	0	0	0	0	0	0	0	0	0	0	0	0	0	0	0	0	0	0	0	0	0	0	0	0	0	0	0	0	0	0	0	0	0	0	0	0	0	0	0	0	0
Supplier 7	Sup7	0	66245.6	0	0	0	0	0	0	0	0	0	0	0	0	0	0	0	0	117.035	8.28091	12.4214	952.98	138.999	163.456	60.0178	205.775	873.988	308.663	111.158	0	0	162.01	42.8699	302.598	51.4438	21.4349	308.663	239.514	164.62	436.657	439.034	12.9283	6.43048	0	0	0	0	0
Supplier 8	Sup8	0	55556	0	0	0	0	0	0	0	0	0	0	0	0	0	0	0	0	106.936	7.56635	11.3495	10.56	127.005	149.352	54.8388	188.019	798.571	282.028	101.566	0	0	148.03	39.1706	276.486	47.0047	19.5853	282.028	218.846	150.415	398.978	401.15	11.8127	5.87559	0	0	0	0	0
Supplier 9	Sup9	0	2500	0	0	0	0	0	0	0	0	0	0	0	0	0	0	0	0	0	0	0	0	0	0	0	0	0	0	0	0	0	0	0	0	0	0	0	0	0	0	0	0	0	0	0	0	0	0
Supplier 10	Sup10	0	3861	0	0	0	0	0	0	0	0	0	0	0	0	0	0	0	0	0	0	0	0	0	0	0	0	0	0	0	0	0	0	0	0	0	0	0	0	0	0	0	0	0	0	0	0	0	0
Supplier 11	Sup11	0	3800	0	0	0	0	0	0	0	0	0	0	0	0	0	0	0	0	0	0	0	0	0	0	0	0	0	0	0	0	0	0	0	0	0	0	0	0	0	0	0	0	0	0	0	0	0	0
Supplier 12	Sup12	0	48.6	0	0	0	0	0	0	0	0	0	0	0	0	0	0	0	0	0	0	0	0	0	0	0	0	0	0	0	0	0	0	0	0	0	0	0	0	0	0	0	0	0	0	0	0	0	0
Supplier 13	Sup13	0	759.32	0	0	0	0	0	0	0	0	0	0	0	0	0	0	0	0	0	0	0	0	0	0	0	0	0	0	0	0	0	0	0	0	0	0	0	0	0	0	0	0	0	0	0	0	0	0
Supplier 14	Sup14	0	38	0	0	0	0	0	0	0	0	0	0	0	0	0	0	0	0	0	0	0	0	0	0	0	0	0	0	0	0	38	0	0	0	0	0	0	0	0	0	0	0	0	0	0	0	0	0
Supplier 15	Sup15	0	0	0	0	0	0	0	0	0	0	0	0	0	0	0	0	0	0	0	0	0	0	0	0	0	0	0	0	0	0	6886.4	0	0	0	0	0	0	0	0	0	0	0	0	0	0	0	0	0
Supplier 16	Sup16	0	0	0	0	0	0	0	0	0	0	0	0	0	0	0	0	0	0	0	0	0	0	0	0	0	0	0	0	0	0	5562.6	0	0	0	0	0	0	0	0	0	0	0	0	0	0	0	0	0
Supplier 17	Sup17	0	0	0	0	0	0	0	0	0	0	0	0	0	0	0	0	0	0	0	0	0	0	0	0	0	0	0	0	0	424	0	0	0	0	0	0	0	0	0	0	0	0	0	0	0	0	0	0
Supplier 18	Sup18	0	0	0	0	0	0	0	0	0	0	0	0	0	0	0	0	0	0	5.863	0	0	0	0	0	0	0	0	0	0	0	0	0	0	0	0	0	0	0	0	0	0	0	0	0	0	0	0	0
Supplier 19	Sup19	0	0	0	0	0	0	0	0	0	0	0	0	0	0	0	0	0	0	0	0	90.694	0	0	0	0	0	0	0	0	0	0	0	0	0	0	0	0	0	0	0	0	0	0	0	0	0	0	0
Note: Unit of contract price is ten thousand RMB. This table is symmetric because of bi-directional property of contract, where 0.00 represents no contractual relationship.
[truncated: 16 more columns]

## Sheet: simulation data
	Owner	PC	PD	PCC	PS	QI1	QI2	S1	S2	S3	S4	S5	S6	D1	D2	D3	D4	D5	CC1	CC2	CC3	CC4	CC5	CC6	CC7	CC8	CC9	CC10	CC11	CC12	CC13	CC14	CC15	CC16	CC17	CC18	CC19	CC20	CC21	CC22	CC23	CC24	CC25	CC26	CC27	Sup1	Sup2	Sup3	Sup4
Owner	0	98688.3	28677.3	238687	347001	77300.7	143365	35906.7	78684.1	256135	105289	387040	161301	137399	269953	109831	352947	19244.3	365506	352383	313195	394536	58644.5	272748	63141.2	392590	280475	288522	179974	85186.9	298980	376737	29701.4	317864	337255	69780	390655	5533.65	108470	341931	231345	157020	128381	196650	363601	297229	262449	86256.6	106884
PC	98688.3	0	342633	231088	27184.1	52630.3	54215.7	203503	398769	306845	157213	53341.7	92302.3	84933.6	95549	51820.5	321266	90564.8	256018	32527.8	308183	367149	174255	128362	200097	98428.9	211663	104712	27768.1	221687	114304	124455	334271	119266	151316	73818.9	200740	13491.2	348043	188841	397364	291055	314649	104186	127180	301524	268333	399783	42339.8
PD	28677.3	342633	0	141264	80690.7	311050	44997	120787	303479	296908	128844	239573	274283	36603.6	190606	154908	33473.9	143782	390142	10910.9	224719	106701	163544	73168	78902.3	157614	90631.3	51461	76711.3	35598.7	372430	259939	101900	346593	213840	118736	236599	213260	288178	5213.13	228338	113389	2278.14	81880.5	305387	295066	174223	282782	116249
PCC	238687	231088	141264	0	364522	286412	193694	311015	131824	51034.9	108417	151964	146284	101383	22106.6	125694	65415.2	295356	255789	263749	349059	28038.6	377096	366501	73489.8	10626.1	191133	304678	223606	30550.3	2321.82	368891	68313.8	293873	299761	151527	293895	296044	92285.4	376848	246425	157225	294903	368131	260426	270696	204677	210803	64748.9
PS	347001	27184.1	80690.7	364522	0	188245	371592	2959.69	217206	274520	1885.14	159781	77321.6	83085.2	337310	342984	10503.7	211895	321393	68473.8	88765.5	135003	158025	46718.5	271775	311213	17490.5	322991	380094	377208	189358	259289	189194	24434.3	160397	254551	399526	278307	125980	151448	60205.1	112270	243197	310660	330289	397432	92297.6	166143	294855
QI1	77300.7	52630.3	311050	286412	188245	0	90761.7	100788	191975	299907	125558	316350	48389.2	247241	240748	318317	129394	284797	352913	195214	324895	354929	320602	391192	360022	178362	326482	105952	246829	203913	55276.8	73626	92980	267827	307311	152510	382071	219261	392904	348066	123236	227047	267242	321431	341741	176546	221287	84105.8	177675
QI2	143365	54215.7	44997	193694	371592	90761.7	0	266970	86996.3	143710	265316	216048	261560	357926	112153	250326	82151	198914	383988	235686	57883.9	3258.66	1079.21	82981.2	241705	46917.8	80194.8	321059	326567	394652	114657	341132	122322	29135.4	187534	186183	1851.55	130461	377872	350308	291430	151297	335690	51643.3	111280	282540	236898	323188	297599
S1	35906.7	203503	120787	311015	2959.69	100788	266970	0	318456	76499.8	203444	181962	125245	287518	387301	221582	211661	318683	124646	126022	230670	59140.1	209166	367769	104296	400157	209955	172385	226583	288608	215976	392649	199774	38929.4	354056	303292	357298	232317	310239	8694.79	226395	51936.4	33857.2	133805	45951.6	348871	326259	162028	400997
S2	78684.1	398769	303479	131824	217206	191975	86996.3	318456	0	230519	352421	5710.89	28204.5	347239	35210.3	94887.1	13609.9	82970.2	242574	143755	154015	115774	285502	268521	233745	272500	292324	356443	215853	286209	135452	130398	338505	207185	110396	102578	97878.8	360138	333562	350728	58487.2	61232.5	278941	136093	244541	25760.7	327455	41294.5	330981
S3	256135	306845	296908	51034.9	274520	299907	143710	76499.8	230519	0	30544.9	127722	260848	336415	18822	95207.2	63235.4	377992	110059	390441	261107	53237.8	89177.2	90108.7	191418	177434	23376.9	312411	3616.61	117958	326563	102103	330618	293718	286378	273539	34868	357244	22375.3	349280	221360	283893	137656	90545.3	62681.6	74758.1	86276.1	350490	231513
S4	105289	157213	128844	108417	1885.14	125558	265316	203444	352421	30544.9	0	109569	340689	7852.99	247872	122721	242356	263430	29314.5	46365.9	219594	16458.9	115879	60652.1	348483	61296.8	168972	106293	115892	379278	210015	228205	22910.1	114063	53469.8	16308.1	360206	121942	57100.7	43019.6	250924	107453	302220	399960	21382.3	2230.19	281761	247173	197708
S5	387040	53341.7	239573	151964	159781	316350	216048	181962	5710.89	127722	109569	0	40666.7	132938	388690	89753.7	232453	97662.8	58288.5	359349	153674	362058	322494	287933	271212	124943	31939	83933.3	262858	162835	74691.2	294153	57650.2	395257	137778	182238	360824	106101	202386	384971	274313	335170	52705.2	91352.1	150708	347196	353269	250372	93783.7
S6	161301	92302.3	274283	146284	77321.6	48389.2	261560	125245	28204.5	260848	340689	40666.7	0	22576.2	50701.1	64588.7	216859	112162	130639	338925	61303.8	387279	358947	39457.8	243781	214266	206097	150891	349883	39915	353353	252563	103090	232549	209363	319866	104411	267943	270613	166423	270338	68505.2	289342	109245	375556	224934	106442	119187	61696.6
D1	137399	84933.6	36603.6	101383	83085.2	247241	357926	287518	347239	336415	7852.99	132938	22576.2	0	149056	357368	383754	37918	221584	48792.8	91032.8	170282	325725	224943	353264	173189	227147	320757	286118	16144.8	22319.6	11039.9	357000	376185	132737	227059	299251	123588	70573.4	368083	117946	271738	10043.1	139830	81593.6	35897.1	338040	274493	288220
D2	269953	95549	190606	22106.6	337310	240748	112153	387301	35210.3	18822	247872	388690	50701.1	149056	0	311493	253196	273045	71298.4	61057.6	126326	61951.1	264306	211183	323363	357740	117850	97465.2	294593	158569	215714	118708	99701.9	95767.9	278833	243780	159881	254649	156583	215027	57041	97539.3	162385	147416	172424	170186	323085	170478	241025
D3	109831	51820.5	154908	125694	342984	318317	250326	221582	94887.1	95207.2	122721	89753.7	64588.7	357368	311493	0	240842	373660	223103	301928	43695.3	397085	396211	87941.2	240409	61162.5	348589	312586	302544	239940	253426	48539	149617	339081	344769	301741	276142	224870	368610	99744.7	386619	259815	344406	217036	202040	20462.9	146815	293328	206348
D4	352947	321266	33473.9	65415.2	10503.7	129394	82151	211661	13609.9	63235.4	242356	232453	216859	383754	253196	240842	0	229898	266754	70928.6	140264	280365	270194	267680	74272.7	203886	295445	111897	25126.9	4418.13	353362	57671.2	123848	181327	366633	270617	939.964	40015.6	386208	313798	228976	134147	329687	220245	80382.1	80819.5	293788	254020	337743
D5	19244.3	90564.8	143782	295356	211895	284797	198914	318683	82970.2	377992	263430	97662.8	112162	37918	273045	373660	229898	0	218229	239331	149860	274604	81181.4	181460	373935	291093	266242	207820	312409	120578	302668	294133	170834	25048.3	349327	293631	337294	153078	305041	241153	82235.9	185299	133859	42732.9	251856	57942.6	228301	367146	113846
CC1	365506	256018	390142	255789	321393	352913	383988	124646	242574	110059	29314.5	58288.5	130639	221584	71298.4	223103	266754	218229	0	184354	115550	159087	58019.5	196800	264789	291931	386089	105934	6675.03	139458	150093	185061	51054	30410	309180	145263	317723	227801	29296.3	81725.2	105870	283546	261695	194797	7514.07	184849	127210	106674	201056
CC2	352383	32527.8	10910.9	263749	68473.8	195214	235686	126022	143755	390441	46365.9	359349	338925	48792.8	61057.6	301928	70928.6	239331	184354	0	376111	397672	80760.1	187725	278553	323781	356334	248340	140263	276191	339879	214168	311862	316018	299907	359307	110049	20134.6	169767	151016	36429.2	143136	156739	150583	328224	321550	131104	3283.46	42889
CC3	313195	308183	224719	349059	88765.5	324895	57883.9	230670	154015	261107	219594	153674	61303.8	91032.8	126326	43695.3	140264	149860	115550	376111	0	365185	39776.3	310578	322738	277740	372603	166912	268046	135164	198078	116053	83535.3	43073.2	282614	389991	340128	192631	71407.1	26233.7	272312	123440	177417	214441	135561	44821.4	159410	292115	131603
CC4	394536	367149	106701	28038.6	135003	354929	3258.66	59140.1	115774	53237.8	16458.9	362058	387279	170282	61951.1	397085	280365	274604	159087	397672	365185	0	250155	145530	152374	217540	286028	127805	233808	50899.5	52932	337262	317435	397136	240223	4528.67	121131	9348.35	104356	396306	377845	297319	241256	305805	71090.6	153928	40648.4	324971	263561
CC5	58644.5	174255	163544	377096	158025	320602	1079.21	209166	285502	89177.2	115879	322494	358947	325725	264306	396211	270194	81181.4	58019.5	80760.1	39776.3	250155	0	287107	100275	52790.4	33429.1	120604	318502	213922	185019	63611.1	342244	200388	272598	218860	57140	176497	167243	207219	61483.3	314620	396864	229087	109470	338365	108847	151142	351876
CC6	272748	128362	73168	366501	46718.5	391192	82981.2	367769	268521	90108.7	60652.1	287933	39457.8	224943	211183	87941.2	267680	181460	196800	187725	310578	145530	287107	0	131837	178813	102096	185942	32155.2	362902	46287.3	9201.57	2038.95	297348	120276	284514	279738	97262.1	93351	379561	267811	214963	29923.3	65012.2	272035	174024	12276.5	128289	305855
CC7	63141.2	200097	78902.3	73489.8	271775	360022	241705	104296	233745	191418	348483	271212	243781	353264	323363	240409	74272.7	373935	264789	278553	322738	152374	100275	131837	0	197289	139697	330041	30456.3	113468	115452	240545	330403	141555	216895	372822	83190.2	325653	68654.7	87078.9	313699	85831.3	142997	78865.5	179636	397826	265639	358517	325821
CC8	392590	98428.9	157614	10626.1	311213	178362	46917.8	400157	272500	177434	61296.8	124943	214266	173189	357740	61162.5	203886	291093	291931	323781	277740	217540	52790.4	178813	197289	0	359825	180320	200413	211744	162599	260245	113780	29339.1	371870	13676.5	75169.1	176311	174445	275610	361681	153909	82702.4	12146.9	360078	145834	363788	187686	191965
CC9	280475	211663	90631.3	191133	17490.5	326482	80194.8	209955	292324	23376.9	168972	31939	206097	227147	117850	348589	295445	266242	386089	356334	372603	286028	33429.1	102096	139697	359825	0	384371	70207.6	318977	28127	196231	44135.7	330537	283119	367239	149666	356303	90312.6	187211	204342	241320	161818	197128	113863	309438	150764	370050	114311
CC10	288522	104712	51461	304678	322991	105952	321059	172385	356443	312411	106293	83933.3	150891	320757	97465.2	312586	111897	207820	105934	248340	166912	127805	120604	185942	330041	180320	384371	0	35456.7	122225	156808	398625	168022	97098.3	309527	231998	286921	41873	380222	102675	153962	324540	144960	46971.6	223956	268373	103472	269817	181987
CC11	179974	27768.1	76711.3	223606	380094	246829	326567	226583	215853	3616.61	115892	262858	349883	286118	294593	302544	25126.9	312409	6675.03	140263	268046	233808	318502	32155.2	30456.3	200413	70207.6	35456.7	0	5853.29	306995	205927	64394.4	22670.5	231402	56362	170375	376007	151509	335847	301739	38153.7	315760	222199	119538	56283	351411	50040.3	115318
CC12	85186.9	221687	35598.7	30550.3	377208	203913	394652	288608	286209	117958	379278	162835	39915	16144.8	158569	239940	4418.13	120578	139458	276191	135164	50899.5	213922	362902	113468	211744	318977	122225	5853.29	0	375179	153676	22286.9	23479.7	386432	123996	119929	149898	144206	116912	181940	308115	218871	148118	379273	38780.8	299460	182863	143428
CC13	298980	114304	372430	2321.82	189358	55276.8	114657	215976	135452	326563	210015	74691.2	353353	22319.6	215714	253426	353362	302668	150093	339879	198078	52932	185019	46287.3	115452	162599	28127	156808	306995	375179	0	219162	307189	284593	12323.2	99497.5	271940	64820.8	397783	46579.6	228925	350535	284830	166062	303526	390923	106963	135321	246061
CC14	376737	124455	259939	368891	259289	73626	341132	392649	130398	102103	228205	294153	252563	11039.9	118708	48539	57671.2	294133	185061	214168	116053	337262	63611.1	9201.57	240545	260245	196231	398625	205927	153676	219162	0	345483	171518	212115	18980.9	134482	5937.59	130797	153520	129802	333495	210689	122556	231190	59532.8	145836	323082	166363
CC15	29701.4	334271	101900	68313.8	189194	92980	122322	199774	338505	330618	22910.1	57650.2	103090	357000	99701.9	149617	123848	170834	51054	311862	83535.3	317435	342244	2038.95	330403	113780	44135.7	168022	64394.4	22286.9	307189	345483	0	280191	107469	79709.8	380516	147027	358118	85385.1	107725	368064	234370	148366	174979	142931	310838	211169	369777
CC16	317864	119266	346593	293873	24434.3	267827	29135.4	38929.4	207185	293718	114063	395257	232549	376185	95767.9	339081	181327	25048.3	30410	316018	43073.2	397136	200388	297348	141555	29339.1	330537	97098.3	22670.5	23479.7	284593	171518	280191	0	77448.6	119655	46032.4	172547	148475	204102	293319	164219	88425.9	117056	325117	68299.8	341215	39175.9	128858
CC17	337255	151316	213840	299761	160397	307311	187534	354056	110396	286378	53469.8	137778	209363	132737	278833	344769	366633	349327	309180	299907	282614	240223	272598	120276	216895	371870	283119	309527	231402	386432	12323.2	212115	107469	77448.6	0	397144	366541	171190	966.187	208711	2917.04	354570	273944	350612	249556	310397	268157	182424	301404
CC18	69780	73818.9	118736	151527	254551	152510	186183	303292	102578	273539	16308.1	182238	319866	227059	243780	301741	270617	293631	145263	359307	389991	4528.67	218860	284514	372822	13676.5	367239	231998	56362	123996	99497.5	18980.9	79709.8	119655	397144	0	370000	6871.81	305386	368829	260177	191694	134120	258081	145161	302441	111014	386018	82431.9
CC19	390655	200740	236599	293895	399526	382071	1851.55	357298	97878.8	34868	360206	360824	104411	299251	159881	276142	939.964	337294	317723	110049	340128	121131	57140	279738	83190.2	75169.1	149666	286921	170375	119929	271940	134482	380516	46032.4	366541	370000	0	123425	171233	379332	82083	12570.1	276714	301514	23510.9	80600	86186.9	179498	121868
CC20	5533.65	13491.2	213260	296044	278307	219261	130461	232317	360138	357244	121942	106101	267943	123588	254649	224870	40015.6	153078	227801	20134.6	192631	9348.35	176497	97262.1	325653	176311	356303	41873	376007	149898	64820.8	5937.59	147027	172547	171190	6871.81	123425	0	52248.5	381380	262668	384383	391338	328578	300500	355802	215092	63666.9	107821
CC21	108470	348043	288178	92285.4	125980	392904	377872	310239	333562	22375.3	57100.7	202386	270613	70573.4	156583	368610	386208	305041	29296.3	169767	71407.1	104356	167243	93351	68654.7	174445	90312.6	380222	151509	144206	397783	130797	358118	148475	966.187	305386	171233	52248.5	0	199239	111034	221897	283230	325093	400948	176613	256134	234062	278179
CC22	341931	188841	5213.13	376848	151448	348066	350308	8694.79	350728	349280	43019.6	384971	166423	368083	215027	99744.7	313798	241153	81725.2	151016	26233.7	396306	207219	379561	87078.9	275610	187211	102675	335847	116912	46579.6	153520	85385.1	204102	208711	368829	379332	381380	199239	0	344579	114009	240387	156438	234490	176072	16068.8	383105	66962.3
CC23	231345	397364	228338	246425	60205.1	123236	291430	226395	58487.2	221360	250924	274313	270338	117946	57041	386619	228976	82235.9	105870	36429.2	272312	377845	61483.3	267811	313699	361681	204342	153962	301739	181940	228925	129802	107725	293319	2917.04	260177	82083	262668	111034	344579	0	160171	68750.1	17751	82083.9	274457	376184	340008	213332
CC24	157020	291055	113389	157225	112270	227047	151297	51936.4	61232.5	283893	107453	335170	68505.2	271738	97539.3	259815	134147	185299	283546	143136	123440	297319	314620	214963	85831.3	153909	241320	324540	38153.7	308115	350535	333495	368064	164219	354570	191694	12570.1	384383	221897	114009	160171	0	338329	9685.89	307649	44805.8	308909	34617.5	80791.2
CC25	128381	314649	2278.14	294903	243197	267242	335690	33857.2	278941	137656	302220	52705.2	289342	10043.1	162385	344406	329687	133859	261695	156739	177417	241256	396864	29923.3	142997	82702.4	161818	144960	315760	218871	284830	210689	234370	88425.9	273944	134120	276714	391338	283230	240387	68750.1	338329	0	349904	398906	222265	157969	344111	63077.2
CC26	196650	104186	81880.5	368131	310660	321431	51643.3	133805	136093	90545.3	399960	91352.1	109245	139830	147416	217036	220245	42732.9	194797	150583	214441	305805	229087	65012.2	78865.5	12146.9	197128	46971.6	222199	148118	166062	122556	148366	117056	350612	258081	301514	328578	325093	156438	17751	9685.89	349904	0	130279	389323	255948	378336	303785
CC27	363601	127180	305387	260426	330289	341741	111280	45951.6	244541	62681.6	21382.3	150708	375556	81593.6	172424	202040	80382.1	251856	7514.07	328224	135561	71090.6	109470	272035	179636	360078	113863	223956	119538	379273	303526	231190	174979	325117	249556	145161	23510.9	300500	400948	234490	82083.9	307649	398906	130279	0	242103	226557	397842	367114
Sup1	297229	301524	295066	270696	397432	176546	282540	348871	25760.7	74758.1	2230.19	347196	224934	35897.1	170186	20462.9	80819.5	57942.6	184849	321550	44821.4	153928	338365	174024	397826	145834	309438	268373	56283	38780.8	390923	59532.8	142931	68299.8	310397	302441	80600	355802	176613	176072	274457	44805.8	222265	389323	242103	0	141192	325298	88195.1
Sup2	262449	268333	174223	204677	92297.6	221287	236898	326259	327455	86276.1	281761	353269	106442	338040	323085	146815	293788	228301	127210	131104	159410	40648.4	108847	12276.5	265639	363788	150764	103472	351411	299460	106963	145836	310838	341215	268157	111014	86186.9	215092	256134	16068.8	376184	308909	157969	255948	226557	141192	0	99520.4	67703.7
Sup3	86256.6	399783	282782	210803	166143	84105.8	323188	162028	41294.5	350490	247173	250372	119187	274493	170478	293328	254020	367146	106674	3283.46	292115	324971	151142	128289	358517	187686	370050	269817	50040.3	182863	135321	323082	211169	39175.9	182424	386018	179498	63666.9	234062	383105	340008	34617.5	344111	378336	397842	325298	99520.4	0	320737
Sup4	106884	42339.8	116249	64748.9	294855	177675	297599	400997	330981	231513	197708	93783.7	61696.6	288220	241025	206348	337743	113846	201056	42889	131603	263561	351876	305855	325821	191965	114311	181987	115318	143428	246061	166363	369777	128858	301404	82431.9	121868	107821	278179	66962.3	213332	80791.2	63077.2	303785	367114	88195.1	67703.7	320737	0
Sup5	245375	310427	222296	117837	237027	65700.6	149067	361991	164728	333146	390669	225166	274444	219040	300632	258198	58553.5	336321	52224.4	275537	377373	182749	44701.8	24727.4	311508	1089.22	243513	143235	158361	159164	168298	331916	291389	363298	314092	131197	80931.2	262875	43708.2	355564	235705	313554	239446	70029.2	32291.9	332603	61592.5	24676.2	236738
Sup6	186843	185562	364944	63987.3	318648	269987	368821	225447	80823.8	102382	249708	150906	144058	11498.4	307971	95269.4	267251	300392	292345	326798	297018	258664	39732.6	401089	167795	30493.2	297487	401213	220318	238045	61970.1	255507	219156	114144	263965	399014	204633	82368.4	253816	274143	182657	33889.2	397514	15792.1	297515	235555	383917	160480	206140
Sup7	158691	64477.4	228539	239660	329434	398674	137501	249.238	25303.1	187003	396206	15870.3	147117	68238.2	347817	256123	356008	306961	194757	27480.1	207836	163006	233456	387832	386302	400687	206094	289762	58527.8	74985.7	95398	369073	32772.8	279292	75724.3	327915	130184	321225	327461	127240	81583.2	64806.4	365757	283852	48431.8	257005	59778.1	32708.8	298906
Sup8	8681.44	161414	237230	18916.1	1271.19	231318	140685	65136.7	250126	221149	340899	161092	21680.6	400585	17360.6	50557.4	183859	321997	162036	302916	136373	138035	245669	377494	71099.1	47180.2	184099	391853	318457	63026.3	317062	287830	122644	57621.4	398479	310260	205977	151779	106878	239523	43297.5	274285	82770.1	356537	248260	14308.6	340900	56150.3	92596.8
Sup9	50275.3	336056	282055	118024	302201	335371	109021	210608	4009.9	297896	388268	391736	266286	168458	3401.12	145660	276775	162393	95058.1	383970	98946.9	15279.1	105673	323902	319705	50902.3	51496.8	26175.1	333090	235422	136178	304086	272151	108515	246282	191116	80578.6	236181	345088	296818	340486	206518	136895	72720.7	32840.7	185844	36661	236592	337253
Sup10	43846.9	304103	158148	14173.4	25112.9	4009.6	231128	305535	34940.6	25247.8	256906	363157	164555	313717	203071	105312	152184	189645	288867	232559	187648	103847	258198	15369.2	24336	296846	8757.62	260506	356399	361116	118024	326195	227753	374460	320466	111037	400704	291676	115026	237408	300642	180693	16495.6	383548	193885	33392.2	21356.1	253193	122352
Sup11	218155	320063	272130	390857	264976	98948.7	180920	101112	305211	209579	43590.1	275433	265903	363502	196574	185953	266249	376251	131181	9315.84	310262	34060.8	214972	320408	219738	322197	126651	159127	188891	105963	311969	198293	251600	205578	338917	321466	198929	348008	199505	385999	29230.1	151473	237155	86627.6	271474	267731	302966	313535	247155
Sup12	49716.2	284350	394075	176253	68900.7	3194.68	111248	179472	16180.8	22901.6	17613.1	263020	12620	345639	78698.3	92704.2	37591.9	367420	65358.3	141850	32677.7	239427	155037	189081	395991	65718.6	379155	185435	378110	132641	356758	12764.8	285809	343588	116040	249018	393418	203700	325713	276562	14705.7	45221.7	396096	104193	28801.7	6396.15	200364	85419.4	322158
Sup13	18942.9	110388	247671	159405	283679	155504	50406.9	142874	336324	288554	227413	112245	234912	156179	69515.8	9730.97	367057	339619	349464	301938	245646	80677.1	103178	3847.96	136169	300753	113013	1547.37	12237.3	277501	109244	39597.7	153095	254180	136863	253215	262126	367886	288231	45326.3	274921	95449.8	352453	252672	22692.4	280792	172775	94155.9	266372
Sup14	393922	237660	104148	141386	195609	111042	321894	106719	76395.6	298282	272717	281289	65809.6	154628	255012	61404.9	65519.8	325596	330240	352192	47738.6	257324	225719	343945	300061	12378.8	342554	188118	194998	207004	155901	154230	82192.2	43647.7	286968	8953.39	400397	30469.6	157448	133266	262327	197970	9358.02	16346.8	162115	188279	382796	115971	264223
Sup15	318408	362704	364185	90530.4	134099	6765.85	167585	327576	337534	33734.8	389206	60659.8	311432	201635	291040	313651	382112	244247	122121	359366	143600	47529.6	144950	175230	283549	358987	44097.1	350073	35046.3	86564.7	3027.3	158460	270498	316876	208373	222948	198071	375384	357888	234203	206532	140632	67826.3	259764	60538.1	53143.2	41681.9	329340	42921.3
Sup16	137042	361962	46692.7	237393	258995	24280.2	326394	384714	304489	197414	237969	149614	59420.7	117122	255619	180316	347904	278385	242315	156753	189378	115960	391118	32583.4	171770	32732.4	342260	354737	90802.2	192181	256300	163018	36501	281491	314557	274938	280734	132746	270217	329444	354865	314108	187118	316268	110006	27040.4	395052	186935	59929.8
Sup17	90931	123066	202131	88514.8	149919	153274	295427	325255	301469	81307.4	20869.9	389782	4335.27	205226	58374.1	215711	359392	182172	67696.8	150842	107410	395738	360779	253102	124544	224317	310713	32976.4	292094	181666	58111.5	35261.4	359974	182217	356668	162660	221264	34690.3	311870	51491.7	45935.3	226788	388556	170028	200224	315621	234385	188596	189863
Sup18	167304	134772	95428.5	160622	382831	77548.5	244089	62030.9	103033	320901	93812	148471	127396	355462	11210.4	252912	93244.4	286134	30456.3	389422	162185	333379	114718	6019.8	231190	23101.7	242595	247693	314136	218734	190235	133133	112561	341272	84814.4	54255.8	225862	275693	145538	275688	138292	332762	265245	142602	32755.1	241065	360073	382451	172949
Sup19	380220	41814.4	225201	307143	216593	189407	283971	110476	188562	346956	236117	395998	377507	380153	227561	4907.28	125261	350268	67082.5	346900	265185	43835.8	390811	82016.9	217831	7655.98	232257	174897	76968.8	373441	324141	267866	120795	22845.8	28163.2	269678	218805	194647	226465	324595	319254	45031.2	201093	27999.2	347923	352681	357657	255651	281265
Note: The data in this table indicate the contract prices of random network in Section 4.3 of paper and are generated by MATLAB. Unit of contract price is ten thousand RMB.
[truncated: 15 more columns]
