# Supplementary material for: Risk Propagation of Delayed Payment in Stakeholder Network of Large Hydropower Project Construction considering Risk Resistance and Mitigation
Source: Hindawi journal article supplement (doi:10.1155/2018/8013207), 2018-07-05
Supplement: f1 [file 8013207.f1.zip › RPDP_without_mitigation.m]

%%%%%%%%%%%%%%%%%%%%%%section 4.2%%%%%%%%%%%%%%%%%%%%
%Results of RPDP wihout considering risk mitigation
clear all;clc
A=xlsread('matrix.xls','sheet3');
[DeD,aver_DeD]=Degree_Distribution(A);
DeD;
for i=1:length(DeD)
    fenmu(i)=DeD(i)+sum(DeD(find((A(i,:)~=0))));
end
fenmu;
for i=1:length(DeD)
    Max_DeD(i)=(DeD(i)+sum(DeD(find((A(i,:)~=0)))))/max(fenmu);
end
Max_DeD;
%%%%%%%%%%%%%%%%%%%
local=[1];
I=zeros(1,size(A,1));
lamuta=mean(Max_DeD)*ones(1,size(A,1));
I(local)=1;
S(1,:)=I;
B=A;
C=A;
for i=1:size(B,1) 
    A(i,:)=[];
    A(:,i)=[];
    sharing(i)=sum(A(:));
    A=B;
end
share=(sum(C(:))-sharing)./sum(C(:));
bet=mean(share)*ones(1,size(A,1))./1;%td=1
Max_time=12;
A(find(A~=0))=1;
for t=1:Max_time
    I_lamuta=1-prod(repmat((1-lamuta),size(A,1),1).^(A.*repmat(I,size(A,1),1)),2);
    I(find(I_lamuta~=0))=1;
    S(t+1,:)=S(t,:)+(1-S(t,:)).*(I_lamuta'>Max_DeD);
%     for j=1:size(A,1)
%         if S(t+1,j)==1
%             S(t+1,j)=S(t+1,j)*(bet(j)>share(j));
%         end
%     end
end
plot(1:Max_time+1,(sum(S,2)/size(A,1))','-p')
sum(S,2)/size(A,1)
