# Supplementary material for: Risk Propagation of Delayed Payment in Stakeholder Network of Large Hydropower Project Construction considering Risk Resistance and Mitigation
Source: Hindawi journal article supplement (doi:10.1155/2018/8013207), 2018-07-05
Supplement: f1 [file 8013207.f1.zip › SNCPYHS_random_network.m]

clear all;clc
A=xlsread('matrix.xls','sheet3');
[DeD,aver_DeD]=Degree_Distribution(A);
DeD;
for i=1:length(DeD)
    fenmu(i)=DeD(i)+sum(DeD(find((A(i,:)~=0))));
end
fenmu;
for i=1:length(DeD)
    Max_DeD(i)=(DeD(i)+sum(DeD(find((A(i,:)~=0)))))/max(fenmu);
end
Max_DeD;
n=0;
m=0;
    B=A;
    C=A;
    for i=1:size(B,1) 
        A(i,:)=[];
        A(:,i)=[];
        sharing(i)=sum(A(:));
        A=B;
    end
    share=(sum(C(:))-sharing)./sum(C(:));
for k=0:0.05:1
    local=1;
    I=zeros(1,size(A,1));
    lamuta=k*ones(1,size(A,1));
    I(local)=1;
    S(1,:)=I;

    for q=0:0.05:1
        bet=q*ones(1,size(A,1))./1;%td=1
        Max_time=12;
        A(find(A~=0))=1;
        for t=1:Max_time
            I_lamuta=1-prod(repmat((1-lamuta),size(A,1),1).^(A.*repmat(I,size(A,1),1)),2);
            I(find(I_lamuta~=0))=1;
            S(t+1,:)=S(t,:)+(1-S(t,:)).*(I_lamuta'>Max_DeD);
            for j=1:size(A,1)
                if S(t+1,j)==1
                    S(t+1,j)=S(t+1,j)*(bet(j)>share(j));
                end
            end
        end
        n=n+1;
        bilv=sum(S,2)/size(A,1);
        result(n)=bilv(Max_time);
    end
    m=m+1;
end
zz=reshape(result,m,m);
[xx,yy]=meshgrid(0:0.05:1,0:0.05:1);
mesh(xx, yy, zz)
xlabel('Probablity of Risk Occurence'),ylabel('Probablity without Recovery'),zlabel('Ultimatly Stable Value');
alpha(0.3)
hold on
%%
clc;clear all
A=xlsread('matrix.xls','sheet3');
[DeD,aver_DeD]=Degree_Distribution(A);
DeD;
N=64;
diagData = zeros(1,N);
nondiagData = rand(1,(N^2-N)/2);
y = triu(ones(N,N),1);
y(find(y)) = nondiagData;
y= y + y' + diag(diagData);
for i=1:64
    for j=1:64
        if i~=j
    A_random(i,j)=min(min(A))+(max(max(A))-min(min(A)))*y(i,j);
        end
    end
end
[DeD_random,aver_DeD_random]=Degree_Distribution(A_random);
DeD_random;
for i=1:length(DeD_random)
    fenmu_random(i)=DeD_random(i)+sum(DeD_random(find((A_random(i,:)~=0))));
end
fenmu_random;
for i=1:length(DeD_random)
    Max_DeD_random(i)=(DeD_random(i)+sum(DeD_random(find((A_random(i,:)~=0)))))/max(fenmu_random);
end
Max_DeD_random;

n=0;
m=0;
    B=A_random;
    C=A_random;
    for i=1:size(B,1) 
        A_random(i,:)=[];
        A_random(:,i)=[];
        sharing(i)=sum(A_random(:));
        A_random=B;
    end
    share=(sum(C(:))-sharing)./sum(C(:));
for k=0:0.05:1
    local=1;
    I=zeros(1,size(A_random,1));
    I(local)=1;
    lamuta=k*ones(1,size(A_random,1));
    S(1,:)=I;

    for q=0:0.05:1
        bet=q*ones(1,size(A_random,1))./1;%td=1
        Max_time=11;
        A_random(find(A_random~=0))=1;
        for t=1:Max_time
            I_lamuta=1-prod(repmat((1-lamuta),size(A_random,1),1).^(A_random.*repmat(I,size(A_random,1),1)),2);
            I(find(I_lamuta~=0))=1;
            S(t+1,:)=S(t,:)+(1-S(t,:)).*(I_lamuta'>Max_DeD_random);
            for j=1:size(A_random,1)
                if S(t+1,j)==1
                    S(t+1,j)=S(t+1,j)*(bet(j)>share(j));
                end
            end
        end
        n=n+1;
        bilv=sum(S,2)/size(A_random,1);
        result1(n)=bilv(Max_time);
    end
    m=m+1;
end
zz1=reshape(result1,m,m);
[xx,yy]=meshgrid(0:0.05:1,0:0.05:1);
surf(xx, yy, zz1)
